# Supplementary material for: Admission Cardiac Diagnostic Testing with Electrocardiography and Troponin Measurement Prognosticates Increased 30‐Day Mortality in COVID‐19
Source: PubMed Central journal article supplement — J Am Heart Assoc. 2020 Dec 29;10(1):e018476. doi: 10.1161/JAHA.120.018476 (PMC7955502; doi:10.1161/jaha.120.018476), 2020-12-29
Supplement: JAH3-10-e018476-s001.pdf [file JAH3-10-e018476-s001.pdf]

# **SUPPLEMENTAL MATERIAL**

Figure S1. Kaplan-Meier estimates of survival by ECG categorization and initial high sensitivity cardiac troponin T.

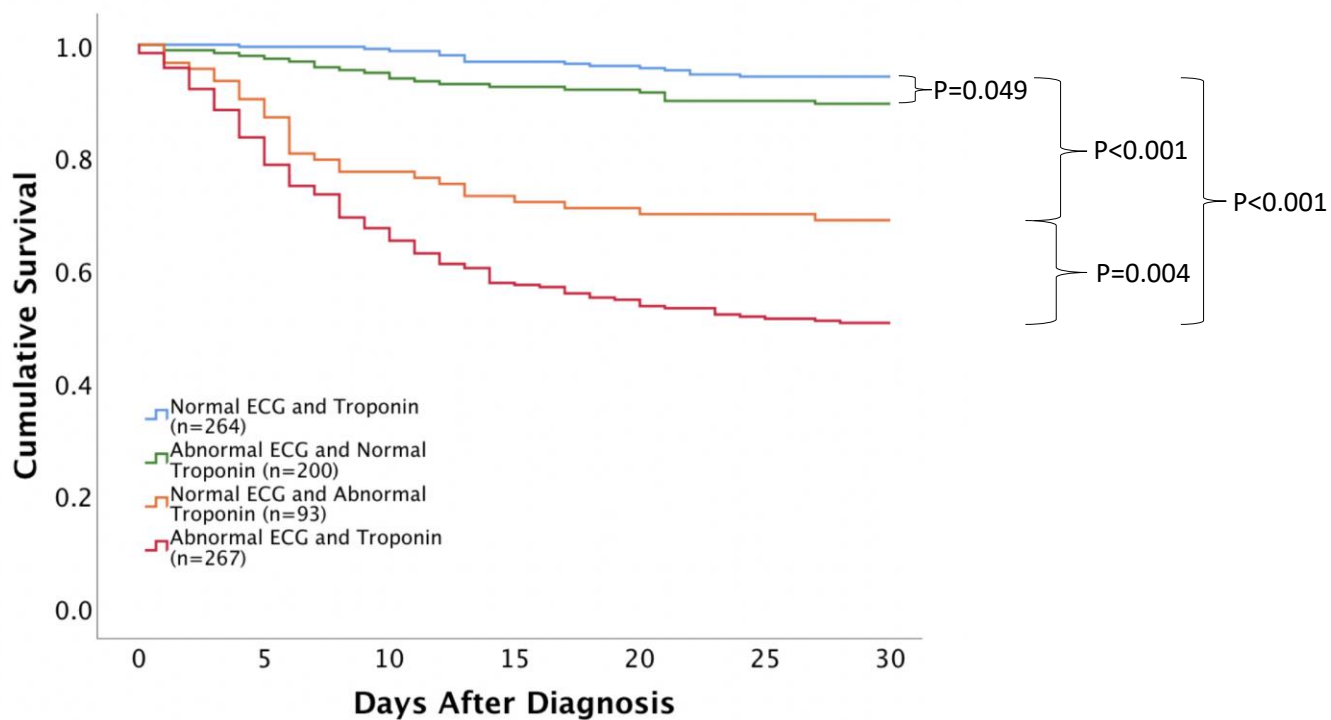

| No. at Risk                      | 0   | 5   | 10  | 15  | 20  | 25  | 30  |
|----------------------------------|-----|-----|-----|-----|-----|-----|-----|
| Normal ECG and Troponin          | 264 | 263 | 261 | 255 | 253 | 249 | 249 |
| Abnormal ECG and Normal Troponin | 200 | 195 | 189 | 185 | 183 | 180 | 179 |
| Normal ECG and Abnormal Troponin | 93  | 88  | 72  | 67  | 65  | 65  | 64  |
| Abnormal ECG and Troponin        | 267 | 222 | 179 | 153 | 145 | 137 | 108 |

This figure demonstrates Kaplan-Meier survival estimates at 30 days for patients stratified by the ECG being categorized as normal/borderline versus abnormal and initial high-sensitivity cardiac troponin T (hs-cTnT) < 20 ng/L versus ≥ 20 ng/L. At 30 days, patient survival was 94% in the

normal ECG and low hs-cTnT group, 90% in the abnormal ECG and low hs-cTnT group, 69% in the normal ECG and high hs-cTnT group, and 51% in the abnormal ECG and high hs-cTnT group. The differences between the normal ECG and low hs-cTnT group, the normal ECG and high hs-cTnT group, and the abnormal ECG and high hs-cTnT group were statistically significant. An ECG was considered abnormal if it met any of the following criteria: ventricular rate less than 50, widened QRS with duration  $\geq 120$  ms, abnormal QRS axis, left bundle branch block, right bundle branch block, nonspecific interventricular conduction delay, left anterior fascicular block, left posterior fascicular block, corrected QT (Bazett)  $\geq 500$  ms, any ST or T wave abnormality, signs of right ventricular strain by S1Q3T3 or right ventricular hypertrophy, significant atrial arrhythmia, second or third degree atrioventricular block, atrial or ventricular pacing, more than 1 atrial or ventricular ectopic beat in a 10 second ECG strip, Q wave infarct, QRS voltage abnormality with left ventricular hypertrophy or low voltage, or ventricular pre-excitation.
